# Supplementary material for: The Effect of Cerium Oxide Nanoparticle Valence State on Reactive Oxygen Species and Toxicity
Source: Springer Nature journal article supplement (doi:10.1007/s12011-015-0297-4), 2015-03-16
Supplement: 12011_2015_297_MOESM2_ESM.pdf [file 12011_2015_297_MOESM2_ESM.pdf]

Title: The Effect of Cerium Oxide Nanoparticle Valence State on Reactive Oxygen Species and Toxicity

Biological Trace Elements Research

Authors: Katherine M Dunnick<sup>\*†</sup>, Rajalekshmi Pillai<sup>‡</sup>, Kelly L Pisane<sup>§‡</sup>, Aleksandr B Stefaniak<sup>‡</sup>, Edward M Sabolsky<sup>‡</sup>, Stephen S Leonard<sup>\*†</sup>

<sup>\*</sup>National Institute for Occupational Safety and Health, HELD, Morgantown, WV 26505

<sup>†</sup>West Virginia University, Pharmaceutical and Pharmacological Sciences, Morgantown, WV 26505

<sup>‡</sup>WVU Benjamin M. Statler College of Engineering and Mineral Resources, Morgantown, WV 26505

<sup>§</sup>West Virginia University, Department of Physics and Astronomy, Morgantown, WV 26505

<sup>‡</sup>National Institute for Occupational Safety and Health, DRDS, Morgantown, WV 26505

Corresponding Author: Katherine Dunnick

E-mail: [kdunnick@mix.wvu.edu](mailto:kdunnick@mix.wvu.edu)

## Online Resource 2

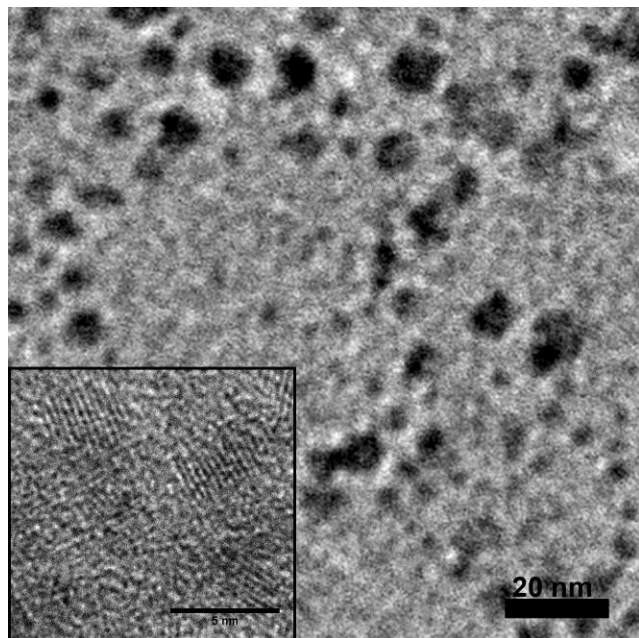

**Online Resource 2** TEM images of pure CeO<sub>2</sub> nanoparticles. Scale bar, 20 nm, inlay 5 nm
